# Supplementary material
Source: PubMed Central journal article supplement (PMC6546795)
Supplement: 10616_2019_314_MOESM1_ESM.pdf [file 10616_2019_314_MOESM1_ESM.pdf]

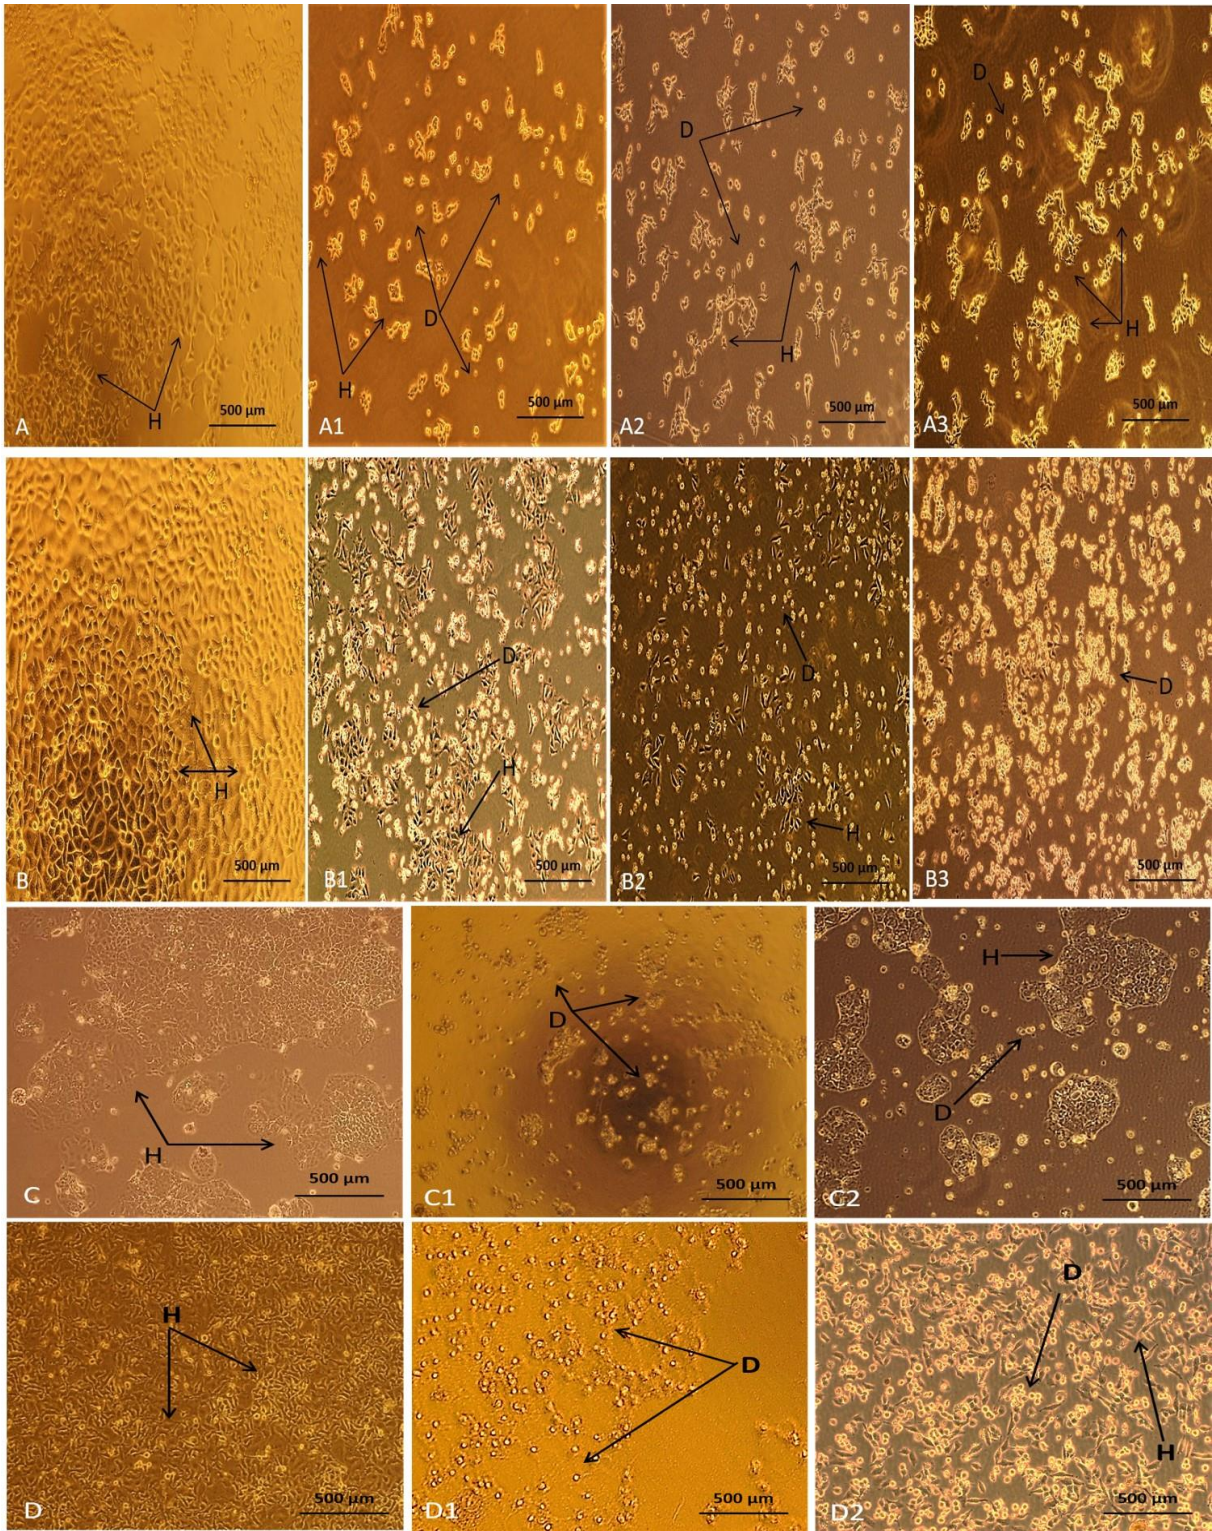

ESM 1 Online Resource 1 Morphological changes on cancer cells line following *H.scoparia* extract-treated were examined under inverted microscope. HEK293, HeLa, MCF-7 and CaCo-2 cells were treated with 5 μg/ml *H.scoparia* extracts for 48 h at 37°C. (**HeLa cells**); **A:** un-treated, **A1:** Hex, **A2:** Chl, **A3:** Met. (**HEK 293 cells**); **B:** un-treated, **B1:** Hex, **B2:** Chl, **B3:** Met. (**CaCo-2 cells**); **C:** un-treated, **C1:** Hex, **C2:** Met. (**MCF-7 cells**); **D:** un-treated, **D1:** Chl, **D2:** Met Hex: *n*-Hexane, Chl: Chloroform, Met: Methanol

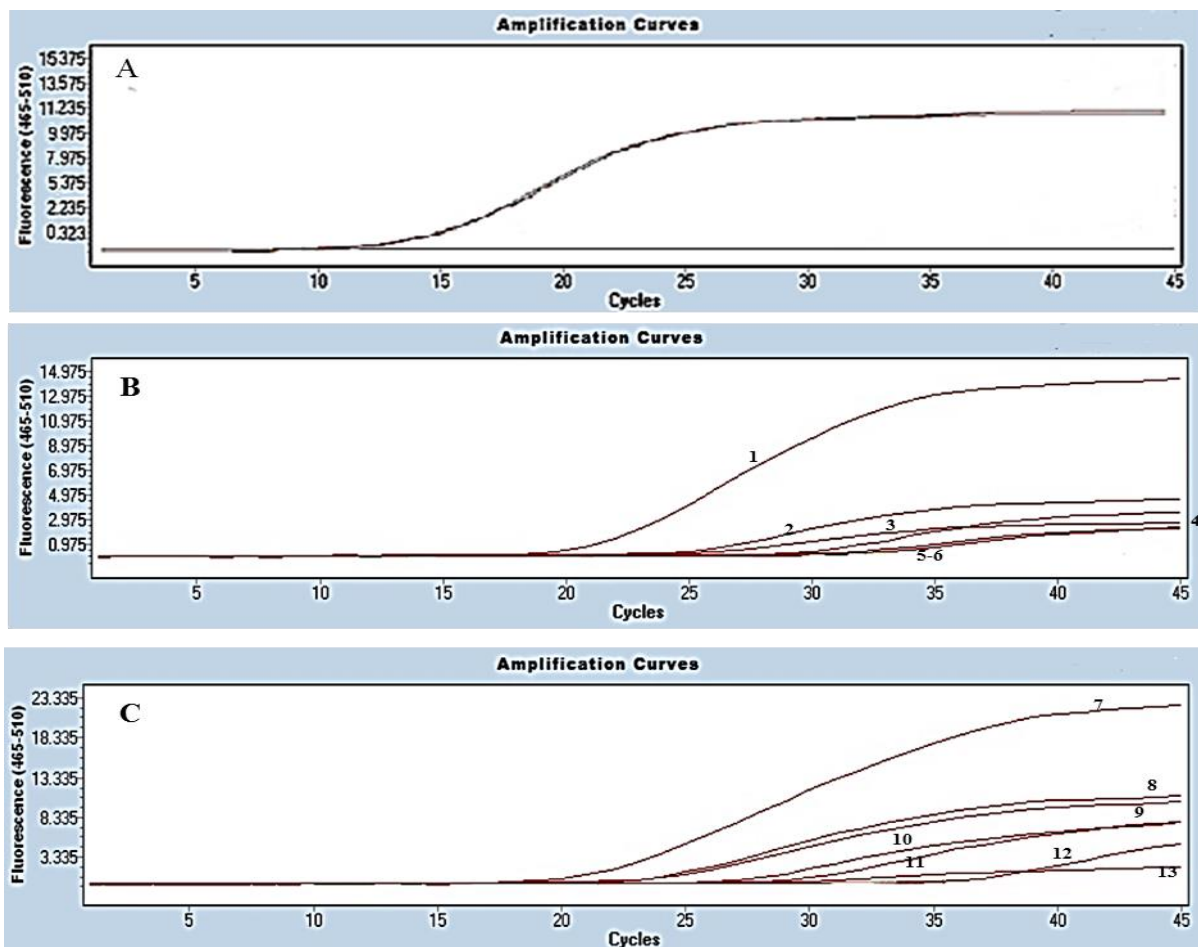

ESM 2 Online Resource 2 Amplification curves of Ct values for the expression of studied genes in reference cancer cell lines obtained by RT-PCR. Ct values of ACTB1/GAPDH1 referans genes (a) and examples (b and c) at 465-510 nm defined as (1) HeLa cells control (Ct=21.59), (2) CaCo-2 cells control (Ct=25.38), (3) MCF-7 cells control (Ct=26.24), (4) Chl extract in HEK-293 cells (Ct=29.94), (5) Hex extract in HEK-293 cells (Ct=31.56), (6) Met extract in HEK-293 cells (Ct=31.62), (7) Hex extract in HeLa cells (Ct=21.66), (8) Chl extract in HeLa cells (Ct=23.90), (9) Met extract in HeLa cells (Ct=24.41), (10) Hex extract in CaCo-2 cells (Ct=27.59), (11) Met extract in CaCo-2 cells (Ct=29.66), (12) Chl extract in MCF-7 cells (Ct=29.95), (13) Met extract in MCF-7 cells (Ct=36.76). Hex: *n*-Hexane, Chl: Chloroform, Met: Methanol
